# Supplementary material for: Transcriptomic Responses Induced in Muscle and Adipose Tissues of Growing Pigs by Intravenous Infusion of Sodium Butyrate
Source: MDPI journal article supplement (doi:10.3390/biology10060559), 2021-06-20
Supplement: s1 [file s1]

Table S1 Differentially expressed genes in muscle tissue between CO and SB groups

| Gene id   | Gene name    | Log2(FC) | P-value | Q-value | Regulation |
|-----------|--------------|----------|---------|---------|------------|
| 100037920 | MT1D         | -4.84    | 0.000   | 0.000   | down       |
| 100037951 | C9           | -1.52    | 0.000   | 0.005   | down       |
| 100037952 | C6           | -4.77    | 0.000   | 0.000   | down       |
| 100037953 | C8A          | -5.23    | 0.000   | 0.000   | down       |
| 100037954 | C8B          | -5.12    | 0.000   | 0.000   | down       |
| 100037955 | C8G          | -1.97    | 0.000   | 0.000   | down       |
| 100124383 | CFB          | -2.47    | 0.000   | 0.034   | down       |
| 100125972 | SERPINC1     | -4.10    | 0.000   | 0.000   | down       |
| 100126281 | CYP3A46      | -2.85    | 0.000   | 0.000   | down       |
| 100134978 | XIRP1        | -1.55    | 0.000   | 0.005   | down       |
| 100144442 | F2           | -4.14    | 0.000   | 0.000   | down       |
| 100144468 | CYP3A22      | -4.26    | 0.000   | 0.001   | down       |
| 100144531 | PCK1         | -2.72    | 0.000   | 0.000   | down       |
| 100152095 | HRG          | -4.27    | 0.000   | 0.004   | down       |
| 100152209 | LOC100152209 | -4.54    | 0.000   | 0.000   | down       |
| 100152910 | CYP1A2       | -3.87    | 0.000   | 0.000   | down       |
| 100153243 | APOA2        | -14.87   | 0.000   | 0.000   | down       |
| 100153288 | PZP          | -13.21   | 0.000   | 0.000   | down       |
| 100153302 | SLC10A1      | -4.49    | 0.000   | 0.000   | down       |
| 100153386 | SLA-DRB1     | 1.77     | 0.000   | 0.000   | up         |
| 100153513 | SERPINA5     | -3.89    | 0.000   | 0.000   | down       |
| 100153821 | DDIT4        | 1.62     | 0.000   | 0.016   | up         |
| 100153899 | LOC100153899 | -7.55    | 0.000   | 0.000   | down       |
| 100154546 | ABRA         | -1.06    | 0.000   | 0.004   | down       |
| 100155038 | CPB2         | -2.87    | 0.000   | 0.000   | down       |
| 100155590 | FRRS1L       | 2.51     | 0.000   | 0.016   | up         |
| 100155644 | PHIP         | -0.60    | 0.000   | 0.020   | down       |
| 100155795 | MYLIP        | 1.13     | 0.000   | 0.033   | up         |
| 100155919 | UPB1         | -3.73    | 0.000   | 0.000   | down       |
| 100155945 | SERPIND1     | -4.81    | 0.000   | 0.000   | down       |
| 100156325 | LOC100156325 | -5.51    | 0.000   | 0.000   | down       |
| 100156500 | DPYS         | -4.80    | 0.000   | 0.000   | down       |
| 100156540 | RPP30        | -0.73    | 0.000   | 0.021   | down       |
| 100156922 | MAT1A        | -4.09    | 0.000   | 0.000   | down       |
| 100157716 | CPS1         | -4.60    | 0.000   | 0.000   | down       |
| 100157966 | HABP2        | -1.96    | 0.000   | 0.010   | down       |
| 100169652 | BMPR1A       | -0.51    | 0.000   | 0.018   | down       |
| 100170134 | CD209        | 1.78     | 0.000   | 0.009   | up         |
| 100301559 | TDO2         | -6.23    | 0.000   | 0.000   | down       |
| 100381252 | APOC2        | -15.02   | 0.000   | 0.000   | down       |
| 100510993 | PRPS2        | 1.36     | 0.000   | 0.000   | up         |
| 100511413 | ASB5         | -0.56    | 0.001   | 0.038   | down       |

|           |              |       |       |       |      |
|-----------|--------------|-------|-------|-------|------|
| 100511756 | TAT          | -4.04 | 0.000 | 0.000 | down |
| 100511802 | GATD1        | -0.83 | 0.000 | 0.032 | down |
| 100511902 | RCAN1        | -0.89 | 0.000 | 0.016 | down |
| 100512013 | ALDOC        | 1.25  | 0.000 | 0.034 | up   |
| 100512595 | ACSM4        | -3.60 | 0.000 | 0.000 | down |
| 100512615 | ADH1C        | -4.15 | 0.000 | 0.000 | down |
| 100513190 | ASB15        | -0.56 | 0.000 | 0.031 | down |
| 100513366 | ADH4         | -3.78 | 0.000 | 0.002 | down |
| 100513556 | CAVIN3       | 1.12  | 0.000 | 0.007 | up   |
| 100513784 | SRA1         | -5.52 | 0.000 | 0.000 | down |
| 100514063 | UGT2B31      | -5.88 | 0.000 | 0.000 | down |
| 100514354 | FGB          | -4.30 | 0.000 | 0.000 | down |
| 100515523 | ALDOB        | -5.42 | 0.000 | 0.000 | down |
| 100515741 | LOC100515741 | -6.38 | 0.000 | 0.000 | down |
| 100515857 | LOC100515857 | -3.19 | 0.000 | 0.000 | down |
| 100515931 | PPP1R3B      | 1.22  | 0.000 | 0.002 | up   |
| 100516396 | CCL16        | -2.89 | 0.000 | 0.000 | down |
| 100516651 | FGL1         | -3.18 | 0.000 | 0.000 | down |
| 100516980 | A1BG         | -3.96 | 0.000 | 0.000 | down |
| 100517431 | HOXD10       | 3.27  | 0.000 | 0.000 | up   |
| 100517580 | TFR2         | -3.74 | 0.000 | 0.000 | down |
| 100517609 | FETUB        | -4.41 | 0.000 | 0.000 | down |
| 100518846 | C1QB         | 1.16  | 0.000 | 0.001 | up   |
| 100518899 | LECT2        | -3.95 | 0.000 | 0.000 | down |
| 100519843 | MLC1         | 1.89  | 0.001 | 0.049 | up   |
| 100520813 | AKR1D1       | -3.65 | 0.000 | 0.000 | down |
| 100520915 | COL11A2      | 3.22  | 0.000 | 0.022 | up   |
| 100521900 | PAH          | -2.28 | 0.000 | 0.000 | down |
| 100522100 | APOH         | -4.40 | 0.000 | 0.000 | down |
| 100522234 | CDC37L1      | -0.54 | 0.000 | 0.030 | down |
| 100523371 | APOB         | -4.94 | 0.000 | 0.000 | down |
| 100523651 | AKAP7        | 1.13  | 0.001 | 0.044 | up   |
| 100524296 | AGBL1        | -1.19 | 0.000 | 0.000 | down |
| 100525011 | ZNF703       | 1.18  | 0.000 | 0.007 | up   |
| 100525254 | SERPINF2     | -1.98 | 0.000 | 0.005 | down |
| 100525457 | ANKRD23      | -0.74 | 0.000 | 0.011 | down |
| 100525860 | CLTB         | -0.55 | 0.000 | 0.006 | down |
| 100525894 | DUSP26       | -0.85 | 0.000 | 0.000 | down |
| 100620451 | HOXA10       | 1.40  | 0.000 | 0.000 | up   |
| 100620470 | LOC100620470 | -1.63 | 0.000 | 0.016 | down |
| 100620829 | SLCO1B3      | -3.17 | 0.000 | 0.000 | down |
| 100622319 | FAM159B      | -1.34 | 0.001 | 0.037 | down |
| 100622861 | ETNK2        | -3.05 | 0.000 | 0.002 | down |
| 100623255 | LOC100623255 | -4.61 | 0.000 | 0.000 | down |

|           |              |        |       |       |      |
|-----------|--------------|--------|-------|-------|------|
| 100623917 | SIM2         | 1.56   | 0.000 | 0.022 | up   |
| 100623982 | KBTBD8       | -0.81  | 0.000 | 0.016 | down |
| 100624458 | ANKH         | -0.88  | 0.000 | 0.001 | down |
| 100625174 | RETREG1      | -1.16  | 0.000 | 0.012 | down |
| 100625739 | SGK1         | 0.97   | 0.000 | 0.033 | up   |
| 100626178 | FGA          | -4.58  | 0.000 | 0.000 | down |
| 100626664 | YBEY         | -0.51  | 0.000 | 0.021 | down |
| 100626686 | LRMP         | 2.00   | 0.000 | 0.020 | up   |
| 100626873 | CES3         | -1.85  | 0.000 | 0.017 | down |
| 100626886 | HSD17B13     | -2.44  | 0.000 | 0.013 | down |
| 100627139 | ARX          | -0.83  | 0.000 | 0.016 | down |
| 100628033 | HOXC11       | 4.66   | 0.000 | 0.000 | up   |
| 100736962 | LOC100736962 | -3.21  | 0.000 | 0.000 | down |
| 100738210 | ENPP4        | 1.34   | 0.000 | 0.023 | up   |
| 100739493 | GTF2H5       | -1.77  | 0.000 | 0.001 | down |
| 100739741 | LOC100739741 | -6.83  | 0.000 | 0.000 | down |
| 100739841 | HGFAC        | -4.25  | 0.000 | 0.000 | down |
| 102158419 | SLC27A5      | -1.44  | 0.000 | 0.007 | down |
| 102163953 | GPA33        | -1.37  | 0.000 | 0.000 | down |
| 102165584 | LOC102165584 | 4.69   | 0.000 | 0.000 | up   |
| 102166944 | LOC102166944 | -7.67  | 0.000 | 0.000 | down |
| 102167611 | IGFN1        | -0.79  | 0.000 | 0.020 | down |
| 106504545 | LOC106504545 | -4.28  | 0.000 | 0.000 | down |
| 106504547 | LOC106504547 | -4.18  | 0.000 | 0.002 | down |
| 106504800 | LOC106504800 | 1.97   | 0.000 | 0.001 | up   |
| 106506409 | MAP6D1       | 1.66   | 0.000 | 0.009 | up   |
| 106507969 | LOC106507969 | -4.77  | 0.000 | 0.000 | down |
| 106510389 | LOC106510389 | -0.60  | 0.000 | 0.018 | down |
| 110255234 | LOC110255234 | -1.89  | 0.000 | 0.011 | down |
| 110255453 | LOC110255453 | 2.57   | 0.000 | 0.033 | up   |
| 110255634 | LOC110255634 | -1.25  | 0.000 | 0.026 | down |
| 110255938 | GCCR         | -5.17  | 0.000 | 0.000 | down |
| 110256942 | LOC110256942 | -4.41  | 0.000 | 0.003 | down |
| 110257060 | NIPA2        | 0.87   | 0.001 | 0.043 | up   |
| 110257412 | LOC110257412 | 4.32   | 0.000 | 0.000 | up   |
| 110258309 | LOC110258309 | -3.52  | 0.000 | 0.000 | down |
| 110258312 | LOC110258312 | -4.51  | 0.000 | 0.000 | down |
| 110258925 | LOC110258925 | -14.53 | 0.000 | 0.000 | down |
| 110259259 | SMTNL1       | -0.79  | 0.000 | 0.006 | down |
| 110259298 | LOC110259298 | -0.77  | 0.000 | 0.005 | down |
| 110259691 | LOC110259691 | -1.22  | 0.000 | 0.006 | down |
| 110259958 | LOC110259958 | -0.99  | 0.000 | 0.021 | down |
| 110260032 | LOC110260032 | 2.86   | 0.001 | 0.038 | up   |
| 110260668 | LOC110260668 | 7.88   | 0.000 | 0.000 | up   |

|           |              |        |       |       |      |
|-----------|--------------|--------|-------|-------|------|
| 110260683 | METTL7B      | -1.90  | 0.000 | 0.004 | down |
| 110261162 | LOC110261162 | -3.00  | 0.000 | 0.000 | down |
| 110261314 | LOC110261314 | -1.27  | 0.000 | 0.002 | down |
| 396568    | KNR1         | -4.69  | 0.000 | 0.000 | down |
| 396669    | SPP2         | -4.55  | 0.000 | 0.000 | down |
| 396684    | LOC396684    | -4.16  | 0.000 | 0.000 | down |
| 396685    | LOC396685    | -4.82  | 0.000 | 0.000 | down |
| 396686    | SERPINA3-2   | -4.20  | 0.000 | 0.000 | down |
| 396827    | MT-2B        | -2.50  | 0.000 | 0.000 | down |
| 396842    | CRP          | -2.52  | 0.000 | 0.000 | down |
| 396901    | ORM1         | -4.42  | 0.000 | 0.000 | down |
| 396921    | APCS         | -6.24  | 0.000 | 0.000 | down |
| 396937    | ITIH2        | -4.37  | 0.000 | 0.000 | down |
| 396954    | PROC         | -6.56  | 0.000 | 0.000 | down |
| 396960    | ALB          | -4.11  | 0.000 | 0.000 | down |
| 396963    | ITIH1        | -4.56  | 0.000 | 0.000 | down |
| 396996    | TF           | -3.90  | 0.000 | 0.000 | down |
| 396998    | HPX          | -3.58  | 0.000 | 0.000 | down |
| 397005    | MYF6         | -1.02  | 0.000 | 0.004 | down |
| 397049    | SLC22A1      | -12.25 | 0.000 | 0.000 | down |
| 397061    | HP           | -3.28  | 0.000 | 0.000 | down |
| 397124    | RBP4         | -1.43  | 0.000 | 0.008 | down |
| 397154    | CHGB         | 2.67   | 0.000 | 0.009 | up   |
| 397166    | MS4A2        | 1.79   | 0.001 | 0.044 | up   |
| 397192    | VTN          | -3.13  | 0.000 | 0.000 | down |
| 397371    | BHMT         | -6.20  | 0.000 | 0.000 | down |
| 397417    | MT1A         | -3.55  | 0.000 | 0.000 | down |
| 397419    | TTR          | -3.92  | 0.000 | 0.005 | down |
| 397443    | HPD          | -3.98  | 0.000 | 0.000 | down |
| 397474    | F12          | -2.56  | 0.000 | 0.000 | down |
| 397478    | CES1         | -1.93  | 0.000 | 0.000 | down |
| 397518    | F9           | -4.43  | 0.000 | 0.000 | down |
| 397534    | SLCO1A2      | 3.54   | 0.000 | 0.000 | up   |
| 397561    | FASN         | 1.74   | 0.000 | 0.014 | up   |
| 397585    | AHSG         | -4.47  | 0.000 | 0.000 | down |
| 397593    | AMBP         | -4.59  | 0.000 | 0.000 | down |
| 397660    | ADIPOQ       | 1.78   | 0.000 | 0.002 | up   |
| 397682    | GSTA1        | -5.29  | 0.000 | 0.000 | down |
| 397687    | CYP2D25      | -2.95  | 0.000 | 0.000 | down |
| 397688    | SERPINA1     | -1.53  | 0.000 | 0.000 | down |
| 403107    | CYP2C33      | -5.47  | 0.000 | 0.000 | down |
| 403108    | CYP2C34      | -5.72  | 0.000 | 0.000 | down |
| 403149    | CYP2A19      | -1.34  | 0.000 | 0.035 | down |
| 403164    | FGG          | -4.99  | 0.000 | 0.000 | down |

|          |           |       |       |       |      |
|----------|-----------|-------|-------|-------|------|
| 403215   | CYP2C49   | -5.89 | 0.000 | 0.000 | down |
| 403216   | CYP2E1    | -4.30 | 0.000 | 0.020 | down |
| 406187   | APOC3     | -4.47 | 0.000 | 0.000 | down |
| 406870   | CP        | -3.37 | 0.000 | 0.000 | down |
| 414437   | C5        | -2.58 | 0.000 | 0.000 | down |
| 445460   | C1QC      | 1.12  | 0.000 | 0.009 | up   |
| 445461   | C1QA      | 1.16  | 0.000 | 0.028 | up   |
| 448964   | GC        | -5.03 | 0.000 | 0.001 | down |
| 493185   | IFRD1     | -0.65 | 0.000 | 0.016 | down |
| 654411   | PLIN1     | 1.56  | 0.001 | 0.044 | up   |
| 733634   | AKR1C1    | -4.64 | 0.000 | 0.000 | down |
| 733640   | PRKG1     | -1.37 | 0.000 | 0.000 | down |
| 733660   | PLG       | -4.91 | 0.000 | 0.002 | down |
| 733662   | F10       | -1.85 | 0.000 | 0.001 | down |
| 780435   | LOC780435 | -1.93 | 0.000 | 0.036 | down |
| gene2958 | LOC407246 | 2.72  | 0.000 | 0.000 | up   |

Corrected *P*-value (*Q*-value) < 0.05 and fold change > 1.2 or ≤ 0.83 were set as DEG threshold. DEGs, differentially expressed genes.

Table S2 Differentially expressed genes in adipose tissue between CO and SB groups

| Gene id   | Gene name    | Log2(FC) | <i>P</i> -value | <i>Q</i> -value | Regulation |
|-----------|--------------|----------|-----------------|-----------------|------------|
| 100037920 | MT1D         | -5.11    | 0.000           | 0.000           | down       |
| 100037952 | C6           | -4.08    | 0.000           | 0.003           | down       |
| 100037954 | C8B          | -6.25    | 0.000           | 0.000           | down       |
| 100049690 | PNPLA3       | 1.91     | 0.000           | 0.000           | up         |
| 100125972 | SERPINC1     | -4.17    | 0.000           | 0.000           | down       |
| 100144442 | F2           | -2.7     | 0.000           | 0.000           | down       |
| 100144468 | CYP3A22      | -5.48    | 0.000           | 0.001           | down       |
| 100144510 | SLCO2A1      | -1.17    | 0.000           | 0.015           | down       |
| 100144585 | HPCAL4       | -2.59    | 0.000           | 0.030           | down       |
| 100151902 | PBXIP1       | 0.79     | 0.001           | 0.048           | up         |
| 100152022 | MTERF2       | -2.87    | 0.000           | 0.007           | down       |
| 100152095 | HRG          | -5.29    | 0.000           | 0.000           | down       |
| 100152150 | LOC100152150 | -11.81   | 0.000           | 0.000           | down       |
| 100152572 | MAP3K20      | -1.82    | 0.000           | 0.000           | down       |
| 100152612 | PPIF         | 0.84     | 0.001           | 0.048           | up         |
| 100152741 | TBX3         | -1.16    | 0.000           | 0.012           | down       |
| 100152785 | DHRS7        | 0.89     | 0.000           | 0.028           | up         |
| 100152910 | CYP1A2       | -4.38    | 0.000           | 0.002           | down       |
| 100152997 | GADD45G      | 1.59     | 0.000           | 0.005           | up         |
| 100153243 | APOA2        | -5.67    | 0.000           | 0.000           | down       |
| 100153288 | PZP          | -6.2     | 0.000           | 0.000           | down       |
| 100153302 | SLC10A1      | -2.89    | 0.000           | 0.002           | down       |
| 100153386 | SLA-DRB1     | 1.31     | 0.000           | 0.002           | up         |

|           |              |       |       |       |      |
|-----------|--------------|-------|-------|-------|------|
| 100153513 | SERPINA5     | -5.25 | 0.000 | 0.000 | down |
| 100153570 | ZIC1         | 1.72  | 0.000 | 0.011 | up   |
| 100153899 | LOC100153899 | -3.08 | 0.000 | 0.008 | down |
| 100154866 | KCNK5        | 2.16  | 0.000 | 0.003 | up   |
| 100155010 | PI16         | -1.61 | 0.000 | 0.001 | down |
| 100155613 | SVEP1        | 0.99  | 0.000 | 0.004 | up   |
| 100155630 | ZSWIM2       | -2.42 | 0.000 | 0.000 | down |
| 100155930 | ANXA8        | -1.69 | 0.000 | 0.000 | down |
| 100155945 | SERPIND1     | -5.2  | 0.000 | 0.000 | down |
| 100156325 | LOC100156325 | -3.22 | 0.000 | 0.029 | down |
| 100157642 | THBD         | -1.12 | 0.000 | 0.012 | down |
| 100157716 | CPS1         | -4.82 | 0.000 | 0.000 | down |
| 100157783 | NANOS1       | -1.77 | 0.000 | 0.002 | down |
| 100157919 | ARVCF        | 1.17  | 0.000 | 0.002 | up   |
| 100307053 | SELENOV      | 2.37  | 0.000 | 0.039 | up   |
| 100327037 | WNT4         | -2.46 | 0.000 | 0.007 | down |
| 100381252 | APOC2        | -5.13 | 0.000 | 0.000 | down |
| 100510939 | MATN4        | -1.77 | 0.000 | 0.021 | down |
| 100510957 | ACSM2B       | -5.4  | 0.000 | 0.000 | down |
| 100511410 | PDZRN3       | 1.17  | 0.000 | 0.017 | up   |
| 100511727 | EPHB6        | 1.4   | 0.000 | 0.004 | up   |
| 100511756 | TAT          | -7.43 | 0.000 | 0.000 | down |
| 100512595 | ACSM4        | -5.37 | 0.000 | 0.000 | down |
| 100512615 | ADH1C        | -6.86 | 0.000 | 0.000 | down |
| 100513200 | ANKRD34B     | -2.11 | 0.000 | 0.028 | down |
| 100513770 | SLC16A10     | -1.01 | 0.000 | 0.006 | down |
| 100514063 | UGT2B31      | -4.66 | 0.000 | 0.000 | down |
| 100514243 | PRDM8        | -2.08 | 0.000 | 0.018 | down |
| 100514354 | FGB          | -3.57 | 0.000 | 0.000 | down |
| 100514801 | TNS1         | 1.21  | 0.000 | 0.001 | up   |
| 100514952 | GALNT17      | 1.1   | 0.000 | 0.019 | up   |
| 100515523 | ALDOB        | -6.84 | 0.000 | 0.000 | down |
| 100515741 | LOC100515741 | -5.93 | 0.000 | 0.000 | down |
| 100516027 | SFRP2        | 1.21  | 0.000 | 0.012 | up   |
| 100516785 | DCP2         | -1.9  | 0.000 | 0.000 | down |
| 100516839 | WNT2         | -2.27 | 0.000 | 0.004 | down |
| 100516911 | USP44        | -5.83 | 0.000 | 0.000 | down |
| 100516931 | ARL4D        | -1.88 | 0.000 | 0.006 | down |
| 100516980 | A1BG         | -3.55 | 0.000 | 0.000 | down |
| 100517145 | LOC100517145 | -2.53 | 0.000 | 0.033 | down |
| 100517431 | HOXD10       | 2.48  | 0.000 | 0.040 | up   |
| 100517580 | TFR2         | -3.28 | 0.000 | 0.008 | down |
| 100517586 | RDH5         | 1.15  | 0.000 | 0.000 | up   |
| 100518264 | PIGY         | -3.36 | 0.000 | 0.001 | down |

|           |              |        |       |       |      |
|-----------|--------------|--------|-------|-------|------|
| 100518620 | LOC100518620 | 1.11   | 0.000 | 0.005 | up   |
| 100518899 | LECT2        | -3.74  | 0.000 | 0.001 | down |
| 100519066 | HOXA9        | 1.4    | 0.000 | 0.002 | up   |
| 100521236 | HOXA11       | 6.18   | 0.000 | 0.001 | up   |
| 100522100 | APOH         | -5.46  | 0.000 | 0.000 | down |
| 100523371 | APOB         | -5.98  | 0.000 | 0.000 | down |
| 100523701 | AOX1         | 0.88   | 0.000 | 0.027 | up   |
| 100524281 | SCARA5       | -1.43  | 0.000 | 0.028 | down |
| 100524958 | DTX1         | 1.09   | 0.000 | 0.015 | up   |
| 100525254 | SERPINF2     | -2.18  | 0.000 | 0.015 | down |
| 100525601 | VASH2        | -1.86  | 0.000 | 0.023 | down |
| 100525814 | SIX2         | 1.69   | 0.000 | 0.028 | up   |
| 100620451 | HOXA10       | 2.96   | 0.000 | 0.000 | up   |
| 100620470 | LOC100620470 | -1.35  | 0.000 | 0.020 | down |
| 100620623 | SPOCK1       | 1.29   | 0.001 | 0.048 | up   |
| 100620829 | SLCO1B3      | -2.86  | 0.000 | 0.003 | down |
| 100623255 | LOC100623255 | -6.47  | 0.000 | 0.000 | down |
| 100623423 | GAP43        | -2.61  | 0.000 | 0.007 | down |
| 100623504 | LOC100623504 | -11.03 | 0.000 | 0.000 | down |
| 100624042 | SACS         | 3.55   | 0.000 | 0.000 | up   |
| 100624404 | SIK2         | -1.28  | 0.000 | 0.003 | down |
| 100625277 | UPP1         | -2.25  | 0.000 | 0.001 | down |
| 100625649 | ASGR1        | -2.77  | 0.000 | 0.005 | down |
| 100625711 | LOC100625711 | -1.24  | 0.000 | 0.025 | down |
| 100626178 | FGA          | -5.26  | 0.000 | 0.000 | down |
| 100628034 | ZNF276       | 1.13   | 0.000 | 0.021 | up   |
| 100628125 | HOXC10       | 1.8    | 0.000 | 0.007 | up   |
| 100628197 | DHCR24       | 0.81   | 0.000 | 0.025 | up   |
| 100736894 | TIA1         | -0.85  | 0.000 | 0.042 | down |
| 100739741 | LOC100739741 | -5.89  | 0.000 | 0.000 | down |
| 100739753 | TARDBP       | -1.5   | 0.000 | 0.000 | down |
| 100739841 | HGFAC        | -3.12  | 0.000 | 0.000 | down |
| 102158081 | NAT8L        | 1.3    | 0.000 | 0.004 | up   |
| 102158419 | SLC27A5      | -2.71  | 0.000 | 0.007 | down |
| 102159780 | LOC102159780 | -2.31  | 0.000 | 0.019 | down |
| 102160006 | LOC102160006 | 14.71  | 0.000 | 0.000 | up   |
| 102160691 | RXFP2        | -1.84  | 0.000 | 0.030 | down |
| 102165231 | LOC102165231 | 1.31   | 0.000 | 0.017 | up   |
| 102167408 | ADAMTS18     | 1.31   | 0.000 | 0.004 | up   |
| 106504129 | SLC6A6       | -1.27  | 0.000 | 0.005 | down |
| 106504545 | LOC106504545 | -5.03  | 0.000 | 0.001 | down |
| 106504562 | LOC106504562 | -4.02  | 0.000 | 0.000 | down |
| 106505696 | DZIP1L       | 0.8    | 0.000 | 0.036 | up   |
| 106507757 | LOC106507757 | 3.61   | 0.000 | 0.000 | up   |

|           |              |        |       |       |      |
|-----------|--------------|--------|-------|-------|------|
| 106508121 | LOC106508121 | 5.43   | 0.000 | 0.000 | up   |
| 106510070 | YTHDF3       | -1.18  | 0.000 | 0.009 | down |
| 110255234 | LOC110255234 | -1.89  | 0.000 | 0.005 | down |
| 110255237 | LOC110255237 | 1.11   | 0.001 | 0.048 | up   |
| 110256043 | LOC110256043 | 1.13   | 0.000 | 0.019 | up   |
| 110256069 | DOC2B        | -1.39  | 0.000 | 0.021 | down |
| 110256649 | LOC110256649 | 2.62   | 0.000 | 0.022 | up   |
| 110256777 | LOC110256777 | -1.45  | 0.000 | 0.024 | down |
| 110257075 | LOC110257075 | -5.54  | 0.000 | 0.000 | down |
| 110257412 | LOC110257412 | 3.18   | 0.001 | 0.048 | up   |
| 110258312 | LOC110258312 | -5.6   | 0.000 | 0.000 | down |
| 110259165 | LOC110259165 | -2.42  | 0.000 | 0.038 | down |
| 110259691 | LOC110259691 | -1.71  | 0.000 | 0.012 | down |
| 110259869 | LOC110259869 | 2.13   | 0.001 | 0.048 | up   |
| 110260668 | LOC110260668 | 12.31  | 0.000 | 0.000 | up   |
| 396554    | COMP         | 1.65   | 0.000 | 0.002 | up   |
| 396568    | KNG1         | -3.2   | 0.000 | 0.000 | down |
| 396597    | STAR         | -1.86  | 0.000 | 0.007 | down |
| 396598    | GPX3         | -1     | 0.000 | 0.014 | down |
| 396669    | SPP2         | -14.53 | 0.000 | 0.000 | down |
| 396684    | LOC396684    | -4.2   | 0.000 | 0.008 | down |
| 396685    | LOC396685    | -5.61  | 0.000 | 0.000 | down |
| 396686    | SERPINA3-2   | -4.69  | 0.000 | 0.000 | down |
| 396754    | SLC2A4       | 0.94   | 0.000 | 0.012 | up   |
| 396780    | CBR2         | -2.6   | 0.000 | 0.000 | down |
| 396832    | LEP          | 2.63   | 0.000 | 0.000 | up   |
| 396869    | GNLY         | 1.29   | 0.000 | 0.016 | up   |
| 396901    | ORM1         | -4.34  | 0.000 | 0.005 | down |
| 396921    | APCS         | -3.66  | 0.000 | 0.000 | down |
| 396937    | ITIH2        | -3.29  | 0.000 | 0.000 | down |
| 396954    | PROC         | -3.99  | 0.000 | 0.000 | down |
| 396960    | ALB          | -5.66  | 0.000 | 0.000 | down |
| 396963    | ITIH1        | -1.76  | 0.000 | 0.001 | down |
| 396996    | TF           | -3.13  | 0.000 | 0.000 | down |
| 396998    | HPX          | -3.06  | 0.000 | 0.000 | down |
| 397049    | SLC22A1      | -12.26 | 0.000 | 0.000 | down |
| 397060    | DUOX2        | -1.23  | 0.000 | 0.014 | down |
| 397061    | HP           | -2.67  | 0.000 | 0.000 | down |
| 397072    | C3           | -1.13  | 0.000 | 0.003 | down |
| 397192    | VTN          | -1.85  | 0.000 | 0.000 | down |
| 397303    | LBP          | -2.63  | 0.000 | 0.017 | down |
| 397371    | BHMT         | -6.97  | 0.000 | 0.000 | down |
| 397419    | TTR          | -5.27  | 0.000 | 0.000 | down |
| 397478    | CES1         | -1.7   | 0.000 | 0.006 | down |



|          |              |        |       |       |      |
|----------|--------------|--------|-------|-------|------|
| 397491   | IGF1         | 0.93   | 0.000 | 0.033 | up   |
| 397498   | CHRM2        | -2.18  | 0.000 | 0.014 | down |
| 397518   | F9           | -2.68  | 0.000 | 0.004 | down |
| 397534   | SLCO1A2      | 2.23   | 0.000 | 0.001 | up   |
| 397537   | LPL          | 0.93   | 0.000 | 0.003 | up   |
| 397585   | AHSG         | -6.13  | 0.000 | 0.000 | down |
| 397593   | AMBP         | -4.9   | 0.000 | 0.000 | down |
| 397628   | ANGPTL4      | -0.9   | 0.000 | 0.036 | down |
| 397687   | CYP2D25      | -2.54  | 0.000 | 0.001 | down |
| 397688   | SERPINA1     | -3.38  | 0.000 | 0.003 | down |
| 403107   | CYP2C33      | -4.7   | 0.000 | 0.000 | down |
| 403108   | CYP2C34      | -6.29  | 0.000 | 0.000 | down |
| 403164   | FGG          | -5.15  | 0.000 | 0.000 | down |
| 403166   | A2M          | -2.12  | 0.000 | 0.000 | down |
| 403215   | CYP2C49      | -13.81 | 0.000 | 0.000 | down |
| 403216   | CYP2E1       | -5.12  | 0.000 | 0.001 | down |
| 406187   | APOC3        | -4.57  | 0.000 | 0.000 | down |
| 406870   | CP           | -3.34  | 0.000 | 0.000 | down |
| 448964   | GC           | -6.91  | 0.000 | 0.000 | down |
| 492315   | BMP7         | -2.62  | 0.000 | 0.004 | down |
| 595111   | KLF4         | -1.05  | 0.000 | 0.025 | down |
| 733660   | PLG          | -5.35  | 0.000 | 0.001 | down |
| 733665   | MMD          | -1.25  | 0.000 | 0.003 | down |
| 733676   | CSPG4        | 1.41   | 0.000 | 0.001 | up   |
| gene1617 | LOC106509151 | 3.08   | 0.000 | 0.018 | up   |
| gene2958 | LOC407246    | 2.09   | 0.000 | 0.000 | up   |

---

Corrected *P*-value (*Q*-value) < 0.05 and fold change > 1.2 or ≤ 0.83 were set as DEG threshold.

DEGs, differentially expressed genes.
